# Supplementary material
Source: HighWire-hosted journal article supplement (https://www.cfp.ca/highwire/filestream/34512/field_highwire_adjunct_files/1/e194_Appendix_2_Characteristics_of_Systematic_Reviews.pdf)
Supplement: e194_Appendix_2_Characteristics_of_Systematic_Reviews.pdf [file e194_Appendix_2_Characteristics_of_Systematic_Reviews.pdf]

## Appendix 2. Characteristics of Included Systematic Reviews

| Systematic Review | Core Topic   | Subgroup       | Number of RCTs | Number Observational Studies | Total Patients   | Total RCT Patients | Meta-analyses | Modified AMSTAR Score |
|-------------------|--------------|----------------|----------------|------------------------------|------------------|--------------------|---------------|-----------------------|
| King 2014         | Primary Care | Not Applicable | 0              | 47                           | NR               | 0                  | N             | 2                     |
| Lagisetty 2017    | Primary Care | Not Applicable | 10             | 25                           | 7924             | NR                 | N             | 5                     |
| Maree 2016        | Primary Care | Not Applicable | 1              | 14                           | NR               | NR                 | N             | 4                     |
| Simoens 2005      | Primary Care | Not Applicable | 45             | NR                           | NR               | N                  | N             | 3                     |
| Argoff 2013       | Diagnosis    | Not Applicable | 0              | 50                           | NR               | 0                  | N             | 1                     |
| Balbale 2017      | Diagnosis    | Not Applicable | 0              | 12                           | 1884             | 0                  | N             | 4                     |
| Becker 2013       | Diagnosis    | Not Applicable | 0              | 14                           | 1754             | 0                  | N             | 5                     |
| Blanchard 2016    | Diagnosis    | Not Applicable | 0              | 14                           | 2278             | 0                  | N             | 2                     |
| Canan 2017        | Diagnosis    | Not Applicable | 0              | 15                           | 190 - 2.3million | 0                  | N             | 4                     |
| Chou 2009         | Diagnosis    | Not Applicable | 0              | 16                           | 2136             | 0                  | N             | 4                     |
| Cochran 2015      | Diagnosis    | Not Applicable | 0              | 7                            | 134603           | 0                  | N             | 4                     |
| Dowell 2016       | Diagnosis    | Not Applicable | 0              | 6                            | 1339             | 0                  | N             | 5                     |
| Lawrence 2017     | Diagnosis    | Not Applicable | 0              | 34                           | 5234             | 0                  | N             | 6                     |
| Shmulewitz 2015   | Diagnosis    | Not Applicable | 0              | NR                           | 11458            | 0                  | N             | 2                     |
| Smith 2013        | Diagnosis    | Not Applicable | 0              | 11                           | NR               | 0                  | N             | 2                     |

|                 |                                |                                |                                         |    |       |       |   |   |
|-----------------|--------------------------------|--------------------------------|-----------------------------------------|----|-------|-------|---|---|
| Smith 2015      | Diagnosis                      | Not Applicable                 | 0                                       | 6  | 1036  | 0     | N | 2 |
| Solanki 2011    | Diagnosis                      | Not Applicable                 | 0                                       | 5  | ~5000 | 0     | N | 2 |
| Turk 2008       | Diagnosis                      | Not Applicable                 | 0                                       | 9  | 16420 | 0     | N | 3 |
| Mattick 2014    | Pharmacotherapy                | Buprenorphine                  | 31                                      | 0  | 5430  | 5430  | Y | 6 |
| Neilsen 2016    | Pharmacotherapy                | Buprenorphine                  | 6                                       | 0  | 607   | 607   | Y | 6 |
| Mattick 2009    | Pharmacotherapy                | Methadone                      | 11                                      | 0  | 1969  | 1969  | Y | 6 |
| Jarvis 2018     | Pharmacotherapy                | Naltrexone (injectable)        | 12                                      | 6  | NR    | NR    | Y | 4 |
| Minozzi 2011    | Pharmacotherapy                | Naltrexone (oral)              | 13                                      | 0  | 1158  | 1158  | Y | 6 |
| Frank 2017      | Tapering (Duration of Therapy) | Not Applicable                 | 11                                      | 56 | 12546 | NR    | N | 5 |
| Gowing 2017     | Tapering (Duration of Therapy) | Not Applicable                 | 27                                      | 0  | 3048  | 3048  | Y | 5 |
| Amato 2011      | Psychosocial                   | All Psychosocial Interventions | 35                                      | 0  | 4319  | 4319  | Y | 6 |
| Chou 2016       | Psychosocial                   | All Psychosocial Interventions | 28 included (study design not reported) |    | NR    | NR    | N | 4 |
| Gilchrist 2017  | Psychosocial                   | All Psychosocial Interventions | 32                                      | 0  | 12840 | 12840 | Y | 6 |
| Timko 2016      | Psychosocial                   | All Psychosocial Interventions | 55 included (study design not reported) |    | NR    | NR    | N | 4 |
| DiClemente 2017 | Psychosocial                   | Motivational Interviewing      | 34 included (study design not reported) |    | NR    | NR    | N | 3 |

|              |                       |                        |                                         |    |       |      |   |   |
|--------------|-----------------------|------------------------|-----------------------------------------|----|-------|------|---|---|
| Ainscough    | Psychosocial          | Contingency Management | 22                                      | 0  | 2333  | 2333 | Y | 4 |
| Davis 2016   | Psychosocial          | Contingency Management | 69 included (study design not reported) |    | NR    | NR   | N | 1 |
| Dugosh 2016  | Psychosocial          | Contingency Management | 27 included (study design not reported) |    | NR    | NR   | N | 2 |
| Saulle 2017  | Prescribing Practices | Witnessed Ingestion    | 4                                       | 2  | 7999  | 707  | Y | 6 |
| Chou 2014    | Prescribing Practices | Urine Drug Screening   | 0                                       | 1  | 2378  | 0    | N | 5 |
| Taveros 2016 | Comorbidities         | Acute Pain             | 0                                       | 7  | 142   | 0    | N | 5 |
| Morasco 2011 | Comorbidities         | Chronic Pain           | 0                                       | 38 | NR    | 0    | N | 5 |
| Hassan 2017  | Comorbidities         | Anxiety                | 22                                      | 0  | 1416* | 1416 | Y | 6 |

\*From 19/22 studies reported in systematic review
